# Supplementary material for: Prevalence and Incidence of Dementia in South Korea: A Nationwide Analysis of the National Health Insurance Service Senior Cohort
Source: PubMed Central journal article supplement — J Clin Neurol. 2021 Mar 30;17(2):249–56. doi: 10.3988/jcn.2021.17.2.249 (PMC8053535; doi:10.3988/jcn.2021.17.2.249), 2021-03-30
Supplement: jcn-17-249-s001.pdf [file jcn-17-249-s001.pdf]

**Supplementary Table 1.** Numbers of total and deceased subjects in each year from 2002 to 2015

| <b>Year</b> | <b>Total number</b> | <b>Deceased number</b> | <b>Death rate (%)</b> |
|-------------|---------------------|------------------------|-----------------------|
| 2002        | 558,147             | 0                      | 0.00                  |
| 2003        | 557,195             | 17,274                 | 3.10                  |
| 2004        | 539,278             | 16,805                 | 3.12                  |
| 2005        | 521,967             | 16,540                 | 3.17                  |
| 2006        | 504,417             | 16,751                 | 3.32                  |
| 2007        | 487,460             | 16,556                 | 3.40                  |
| 2008        | 470,005             | 16,175                 | 3.44                  |
| 2009        | 452,631             | 15,760                 | 3.48                  |
| 2010        | 436,395             | 15,947                 | 3.65                  |
| 2011        | 422,171             | 16,359                 | 3.87                  |
| 2012        | 405,614             | 16,985                 | 4.19                  |
| 2013        | 388,493             | 16,492                 | 4.25                  |
| 2014        | 369,307             | 14,898                 | 4.03                  |
| 2015        | 352,869             | 15,234                 | 4.32                  |
